# Supplementary material for: Non-COVID-19 hospitalization and mortality during the COVID-19 pandemic in Iran: a longitudinal assessment of 41 million people in 2019–2022
Source: PubMed Central journal article supplement (PMC10840276; doi:10.1186/s12889-024-17819-0), 2024-02-05
Supplement: 12889_2024_17819_MOESM1_ESM.pdf [file 12889_2024_17819_MOESM1_ESM.pdf]

## *Supplementary materials*

### Non-COVID-19 Hospitalization and Mortality during the COVID-19 Pandemic in Iran: A Longitudinal Assessment of 41 Million People in 2019–2022

Mahya Razimoghadam, Mehdi Yaseri, Mehdi Rezaee, Aliakbar Fazaeli, Rajabali Daroudi\*

#### **Outline**

| Contents                                                                                                                                                                 | Page Number |
|--------------------------------------------------------------------------------------------------------------------------------------------------------------------------|-------------|
| Figure S1. Study population flowchart                                                                                                                                    | 3           |
| Table S1. Study diagnosis codes based on ICD 10th                                                                                                                        | 4           |
| Table S2. The Number (percentage) of monthly hospital admissions for non-COVID-19 diseases during each period, by age and sex                                            | 5           |
| Table S3. The Number (percentage) of monthly hospital admissions for non-COVID-19 diseases during each period, by type of disease                                        | 6           |
| Table S4. The Number (percentage) of monthly in-hospital deaths from non-COVID-19 diseases during each period, by age and sex                                            | 7           |
| Table S5. The Number (percentage) of monthly in-hospital deaths from non-COVID-19 diseases during each period, by type of disease                                        | 8           |
| Table S6. The hospital admission rate for non-COVID-19 diseases per million/month during each period, by age and sex                                                     | 9           |
| Table S7. The standardized hospital admission rate for non-COVID-19 diseases per million/month during each period, by type of disease                                    | 10          |
| Table S8. The in-hospital mortality rate for non-COVID-19 diseases per 1000/month during each period, by age and sex                                                     | 11          |
| Table S9. The in-hospital mortality rate for non-COVID-19 diseases per 1000/month during each period, by type of disease                                                 | 12          |
| Table S10. The Incidence Rate Ratio of non-COVID-19 hospital admissions at the first peak of COVID-19 compared with the pre-pandemic period, by age and sex              | 13          |
| Table S11. The adjusted Incidence Rate Ratio of non-COVID-19 hospital admissions at the first peak of COVID-19 compared with the pre-pandemic period, by type of disease | 14          |

|                                                                                                                                                                          |    |
|--------------------------------------------------------------------------------------------------------------------------------------------------------------------------|----|
| Table S12. The Odds Ratio of non-COVID-19 in-hospital mortality at the first peak of COVID-19 compared with the pre-pandemic period, by age and sex                      | 15 |
| Table S13. The adjusted Odds Ratio of non-COVID-19 in-hospital mortality at the first peak of COVID-19 compared with the pre-pandemic period, by type of disease         | 16 |
| Table S14. The Incidence Rate Ratio of non-COVID-19 hospital admissions in the first year of COVID-19 compared with the pre-pandemic period, by age and sex              | 17 |
| Table S15. The adjusted Incidence Rate Ratio of non-COVID-19 hospital admissions in the first year of COVID-19 compared with the pre-pandemic period, by type of disease | 18 |
| Table S16. The Odds Ratio of non-COVID-19 in-hospital mortality in the first year of COVID-19 compared with the pre-pandemic period, by age and sex                      | 19 |
| Table S17. The adjusted Odds Ratio of non-COVID-19 in-hospital mortality in the first year of COVID-19 compared with the pre-pandemic period, by type of disease         | 20 |
| Table S18. The Incidence Rate Ratio of non-COVID-19 hospital admissions in the second year of COVID-19 compared with the pre-pandemic period, by age and sex             | 21 |
| Table S19. The adjusted Incidence Rate Ratio of non-COVID-19 hospital admissions in the second year of COVID-19 compared with the pre-pandemic period, by age and sex    | 22 |
| Table S20. The Odds Ratio of non-COVID-19 in-hospital mortality in the second year of COVID-19 compared with the pre-pandemic period, by age and sex                     | 23 |
| Table S21. The adjusted Odds Ratio of non-COVID-19 in-hospital mortality in the second year of COVID-19 compared with the pre-pandemic period, by type of disease        | 24 |
| Table S22. The Incidence Rate Ratio of non-COVID-19 hospital admissions in the second year of COVID-19 compared with the first year, by age and sex                      | 25 |
| Table S23. The adjusted Incidence Rate Ratio of non-COVID-19 hospital admissions in the second year of COVID-19 compared with the first year, by type of disease         | 26 |
| Table S24. The Odds Ratio of non-COVID-19 in-hospital mortality in the second year of COVID-19 compared with the first year, by age and sex                              | 27 |
| Table S25. The adjusted Odds Ratio of non-COVID-19 in-hospital mortality in the second year of COVID-19 compared with the first year, by type of disease                 | 28 |

Figure S1. Study population flowchart for IHIO members from September 23, 2019 to February 19, 2022



Table S1. Study diagnosis codes based on ICD 10th.

| <b>ICD 10th chapters</b>                                             | <b>Short form of chapters name</b> | <b>ICD 10th codes</b> |
|----------------------------------------------------------------------|------------------------------------|-----------------------|
| Infectious and parasitic diseases                                    | Infectious                         | A00-B99               |
| Neoplasms                                                            | Neoplasms                          | C00-D48               |
| Diseases of the blood and blood-forming organs                       | Blood                              | D50-D89               |
| Endocrine, nutritional and metabolic diseases                        | Metabolic                          | E00-E90               |
| Mental and behavioral disorders                                      | Mental                             | F00-F99               |
| Diseases of the nervous system                                       | Nervous Syst.                      | G00-G99               |
| Diseases of the eye and adnexa                                       | Eye                                | H00-H59               |
| Diseases of the ear and mastoid process                              | Ear                                | H60-H95               |
| Diseases of the circulatory system                                   | Circulatory                        | I00-I99               |
| Diseases of the respiratory system                                   | Respiratory                        | J00-J99               |
| Diseases of the digestive system                                     | Digestive                          | K00-K93               |
| Diseases of the skin and subcutaneous tissue                         | Skin                               | L00-L99               |
| Diseases of the musculoskeletal system and connective tissue         | Musculoskeletal                    | M00-M99               |
| Diseases of the genitourinary system                                 | Genitourinary                      | N00-N99               |
| Pregnancy, childbirth and the puerperium                             | Pregnancy                          | O00-O99               |
| Certain conditions originating in the perinatal period               | Perinatal                          | P00-P96               |
| Congenital malformations, deformations and chromosomal abnormalities | Malformations                      | Q00-Q99               |
| Symptoms, signs and abnormal clinical and laboratory findings        | Abnormal symptoms                  | R00-R99               |
| Injury, poisoning and certain other consequences of external causes  | Injury & poisoning                 | S00-T98               |
| External causes of morbidity and mortality                           | External causes                    | V01-Y98               |
| Factors influencing health status and contact with health services   | Health services contact            | Z00-Z99               |
| <b>Selected Diseases</b>                                             |                                    |                       |
| Pneumonia                                                            |                                    | J12-J18               |
| Influenza                                                            |                                    | J09-J11               |
| COPD                                                                 |                                    | J44                   |
| Myocardial infarction                                                |                                    | I21, I22              |
| Heart failure                                                        |                                    | I50                   |
| Stroke                                                               |                                    | I63, I64              |
| <b>Excluded disease</b>                                              |                                    |                       |
| COVID-19                                                             |                                    | U07.1, U07.2          |

Table S2. The Number (percentage) of monthly hospital admissions for non-COVID-19 diseases during each period, by age and sex

| Monthly hospital admission Number (%) | Pre-pandemic |      | Post-pandemic |      |            |      |            |      |             |      |
|---------------------------------------|--------------|------|---------------|------|------------|------|------------|------|-------------|------|
|                                       | Number       | %    | Total         |      | First Peak |      | First year |      | Second year |      |
|                                       |              |      | Number        | %    | Number     | %    | Number     | %    | Number      | %    |
| Total                                 | 200,008      | 100  | 230,086       | 100  | 99,588     | 100  | 184,779    | 100  | 275,394     | 100  |
| <b>Age groups</b>                     |              |      |               |      |            |      |            |      |             |      |
| < 5                                   | 22,967       | 11.5 | 18,798        | 8.2  | 8,898      | 8.9  | 14537      | 7.9  | 23,058      | 8.5  |
| 5_14                                  | 17,703       | 8.9  | 12,278        | 5.3  | 5,297      | 5.3  | 10013      | 5.4  | 14,542      | 5.3  |
| 15-44                                 | 64,763       | 32.4 | 90,521        | 39.3 | 50,977     | 51.2 | 77062      | 41.7 | 103,981     | 37.6 |
| 45-64                                 | 43,671       | 21.8 | 55,221        | 24.0 | 16,351     | 16.4 | 41771      | 22.6 | 68,671      | 25.0 |
| ≥ 65                                  | 50,904       | 25.5 | 53,269        | 23.2 | 18,065     | 18.1 | 41396      | 22.4 | 65,141      | 23.7 |
| <b>Sex</b>                            |              |      |               |      |            |      |            |      |             |      |
| Female                                | 106,561      | 53.3 | 127,752       | 55.5 | 61,210     | 61.5 | 104150     | 56.4 | 151,354     | 54.8 |
| Male                                  | 93,447       | 46.7 | 102,335       | 45.0 | 38,378     | 38.5 | 80630      | 43.6 | 124,040     | 45.2 |

Table S3. The Number (percentage) of monthly hospital admissions for non-COVID-19 diseases during each period, by type of disease

| Monthly hospital admission Number (%) | Pre-pandemic |      | Post-pandemic |      |            |      |            |      |             |      |
|---------------------------------------|--------------|------|---------------|------|------------|------|------------|------|-------------|------|
|                                       | Number       | %    | Total         |      | First Peak |      | First year |      | Second year |      |
|                                       |              |      | Number        | %    | Number     | %    | Number     | %    | Number      | %    |
| Total                                 | 200,008      | 100  | 230,086       | 100  | 99,588     | 100  | 184,779    | 100  | 275,394     | 100  |
| <b>ICD chapters</b>                   |              |      |               |      |            |      |            |      |             |      |
| Infectious                            | 8,391        | 4.2  | 6,109         | 2.7  | 1,779      | 1.8  | 4,444      | 2.4  | 7,774       | 2.8  |
| Neoplasms                             | 5,979        | 3.0  | 8,128         | 3.5  | 2,426      | 2.4  | 6,387      | 3.5  | 9,868       | 3.6  |
| Blood                                 | 1,937        | 1.0  | 5,991         | 2.6  | 1,435      | 1.4  | 3,984      | 2.2  | 7,998       | 2.9  |
| Metabolic                             | 4,229        | 2.1  | 3,999         | 1.7  | 1,376      | 1.4  | 3,255      | 1.8  | 4,743       | 1.7  |
| Mental                                | 5,260        | 2.6  | 5,143         | 2.2  | 1,687      | 1.7  | 4,469      | 2.4  | 5,817       | 2.1  |
| Nervous Syst.                         | 3,525        | 1.8  | 2,928         | 1.3  | 958        | 1.0  | 2,411      | 1.3  | 3,446       | 1.3  |
| Eye                                   | 7,439        | 3.7  | 15,138        | 6.6  | 443        | 0.4  | 9,486      | 5.1  | 20,791      | 7.5  |
| Ear                                   | 927          | 0.5  | 493           | 0.2  | 88         | 0.1  | 399        | 0.2  | 587         | 0.2  |
| Circulatory                           | 23,949       | 12.0 | 22,424        | 9.7  | 8,244      | 8.3  | 18,497     | 10.0 | 26,352      | 9.6  |
| Respiratory                           | 25,961       | 13.0 | 7,623         | 3.3  | 3,962      | 4.0  | 6,215      | 3.4  | 9,032       | 3.3  |
| Digestive                             | 12,624       | 6.3  | 14,958        | 6.5  | 4,701      | 4.7  | 12,084     | 6.5  | 17,832      | 6.5  |
| Skin                                  | 2,227        | 1.1  | 2,179         | 0.9  | 535        | 0.5  | 1,750      | 0.9  | 2,608       | 0.9  |
| Musculoskeletal                       | 3,719        | 1.9  | 4,708         | 2.0  | 588        | 0.6  | 3,433      | 1.9  | 5,984       | 2.2  |
| Genitourinary                         | 14,375       | 7.2  | 21,605        | 9.4  | 6,504      | 6.5  | 15,746     | 8.5  | 27,464      | 10.0 |
| Pregnancy                             | 14,003       | 7.0  | 24,539        | 10.7 | 17,766     | 17.8 | 21,009     | 11.4 | 28,069      | 10.2 |
| Perinatal                             | 7,293        | 3.7  | 7,348         | 3.2  | 5,171      | 5.2  | 6,579      | 3.6  | 8,117       | 2.9  |
| Malformations                         | 1,426        | 0.7  | 1,508         | 0.7  | 353        | 0.4  | 1,249      | 0.7  | 1,766       | 0.6  |
| Abnormal symptoms                     | 17,213       | 8.6  | 17,390        | 7.6  | 6,365      | 6.4  | 12,602     | 6.8  | 22,179      | 8.1  |
| Injury & poisoning                    | 15,712       | 7.9  | 19,379        | 8.4  | 10,644     | 10.7 | 16,722     | 9.0  | 22,036      | 8.0  |
| External causes                       | 1,844        | 0.9  | 2,488         | 1.1  | 1,796      | 1.8  | 2,253      | 1.2  | 2,724       | 1.0  |
| Health services contact               | 21,975       | 11.0 | 36,007        | 15.6 | 22,767     | 22.9 | 31,807     | 17.2 | 40,207      | 14.6 |
| <b>Selected diseases</b>              |              |      |               |      |            |      |            |      |             |      |
| Pneumonia                             | 10,987       | 5.5  | 2,517         | 1.1  | 1,872      | 1.9  | 2,069      | 1.1  | 2,966       | 1.1  |
| Influenza                             | 3,607        | 1.8  | 150           | 0.1  | 146        | 0.1  | 215        | 0.1  | 86          | 0.0  |
| COPD                                  | 3,740        | 1.9  | 1,318         | 0.6  | 640        | 0.6  | 1,069      | 0.6  | 1,567       | 0.6  |
| Myocardial infarction                 | 1,648        | 0.8  | 1,635         | 0.7  | 1,064      | 1.1  | 1,482      | 0.8  | 1,789       | 0.6  |
| Heart failure                         | 914          | 0.5  | 718           | 0.3  | 351        | 0.4  | 639        | 0.3  | 798         | 0.3  |
| Stroke                                | 1,824        | 0.9  | 1,606         | 0.7  | 922        | 0.9  | 1,390      | 0.8  | 1,822       | 0.7  |

Table S4. The Number (percentage) of monthly in-hospital deaths from non-COVID-19 diseases during each period, by age and sex

| Monthly Death Number (%) | Pre-pandemic |      | Post-pandemic |      |            |      |            |      |             |      |
|--------------------------|--------------|------|---------------|------|------------|------|------------|------|-------------|------|
|                          |              |      | Total         |      | First peak |      | First year |      | Second year |      |
|                          | Number       | %    | Number        | %    | Number     | %    | Number     | %    | Number      | %    |
| Total                    | 4,041        | 100  | 4,978         | 100  | 3,186      | 100  | 4,274      | 100  | 5,683       | 100  |
| <b>Age groups</b>        |              |      |               |      |            |      |            |      |             |      |
| < 5                      | 313          | 7.7  | 354           | 7.1  | 326        | 10.2 | 338        | 7.9  | 370         | 6.6  |
| 5_14                     | 61           | 1.5  | 55            | 1.1  | 53         | 1.7  | 51         | 1.2  | 59          | 1.0  |
| 15-44                    | 368          | 9.1  | 487           | 9.8  | 365        | 11.5 | 410        | 9.6  | 563         | 9.9  |
| 45-64                    | 814          | 20.1 | 1,155         | 23.2 | 689        | 21.6 | 943        | 22.1 | 1,367       | 23.8 |
| ≥ 65                     | 2,486        | 61.5 | 2,928         | 58.8 | 1,753      | 55.0 | 2,531      | 59.2 | 3,324       | 58.7 |
| <b>Sex</b>               |              |      |               |      |            |      |            |      |             |      |
| Female                   | 1,797        | 44.5 | 2,212         | 44.4 | 1,385      | 43.5 | 1,874      | 43.8 | 2,550       | 44.8 |
| Male                     | 2,244        | 55.5 | 2,766         | 55.6 | 1,801      | 56.5 | 2,400      | 56.2 | 3,133       | 55.2 |

Table S5. The Number (percentage) of monthly in-hospital deaths from non-COVID-19 diseases during each period, by type of disease

| Monthly Death Number (%) | Pre-pandemic |      | Post-pandemic |      |            |      |            |      |             |      |
|--------------------------|--------------|------|---------------|------|------------|------|------------|------|-------------|------|
|                          | Number       | %    | Total         |      | First Peak |      | First year |      | Second year |      |
|                          |              |      | Number        | %    | Number     | %    | Number     | %    | Number      | %    |
| Total                    | 4,041        | 100  | 5,043         | 100  | 3,186      | 100  | 4,274      | 100  | 5,683       | 100  |
| <b>ICD chapters</b>      |              |      |               |      |            |      |            |      |             |      |
| Infectious               | 316          | 7.8  | 269           | 5.4  | 144        | 4.5  | 210        | 4.9  | 327         | 5.8  |
| Neoplasms                | 296          | 7.3  | 348           | 7.0  | 158        | 5.0  | 285        | 6.7  | 411         | 7.2  |
| Blood                    | 41           | 1.0  | 51            | 1.0  | 40         | 1.3  | 43         | 1.0  | 59          | 1.0  |
| Metabolic                | 104          | 2.6  | 185           | 3.7  | 98         | 3.1  | 153        | 3.6  | 216         | 3.8  |
| Mental                   | 14           | 0.3  | 26            | 0.5  | 13         | 0.4  | 22         | 0.5  | 30          | 0.5  |
| Nervous Syst.            | 77           | 1.9  | 89            | 1.8  | 34         | 1.1  | 76         | 1.8  | 102         | 1.8  |
| Eye                      | 1            | 0.0  | 2             | 0.0  | 0          | 0.0  | 1          | 0.0  | 2           | 0.0  |
| Ear                      | 0            | 0.0  | 1             | 0.0  | 0          | 0.0  | 0          | 0.0  | 1           | 0.0  |
| Circulatory              | 1,113        | 27.5 | 1,341         | 26.9 | 930        | 29.2 | 1,154      | 27.0 | 1,529       | 26.9 |
| Respiratory              | 559          | 13.8 | 533           | 10.7 | 388        | 12.2 | 452        | 10.6 | 615         | 11.0 |
| Digestive                | 217          | 5.4  | 253           | 5.1  | 134        | 4.2  | 216        | 5.1  | 289         | 5.1  |
| Skin                     | 25           | 0.6  | 22            | 0.5  | 13         | 0.4  | 18         | 0.4  | 27          | 0.5  |
| Musculoskeletal          | 22           | 0.5  | 45            | 0.9  | 11         | 0.4  | 35         | 0.8  | 54          | 0.9  |
| Genitourinary            | 185          | 4.6  | 212           | 4.3  | 131        | 4.1  | 181        | 4.2  | 243         | 4.3  |
| Pregnancy                | 3            | 0.1  | 5             | 0.1  | 3          | 0.1  | 5          | 0.1  | 6           | 0.1  |
| Perinatal                | 165          | 4.1  | 210           | 4.2  | 201        | 6.3  | 203        | 4.8  | 217         | 3.8  |
| Malformations            | 52           | 1.3  | 54            | 1.1  | 40         | 1.3  | 50         | 1.2  | 58          | 1.0  |
| Abnormal symptoms        | 495          | 12.2 | 780           | 15.7 | 372        | 11.7 | 635        | 14.8 | 926         | 16.3 |
| Injury & poisoning       | 191          | 4.7  | 254           | 5.1  | 202        | 6.3  | 228        | 5.3  | 281         | 5.0  |
| External causes          | 42           | 1.0  | 30            | 0.6  | 26         | 0.8  | 32         | 0.7  | 29          | 0.4  |
| Health services contact  | 124          | 3.1  | 268           | 5.4  | 248        | 7.8  | 276        | 6.5  | 260         | 4.5  |
| <b>Selected diseases</b> |              |      |               |      |            |      |            |      |             |      |
| Pneumonia                | 204          | 5.0  | 176           | 3.6  | 175        | 5.5  | 156        | 3.6  | 197         | 3.4  |
| Influenza                | 42           | 1.0  | 4             | 0.1  | 4          | 0.1  | 6          | 0.1  | 1           | 0.0  |
| COPD                     | 92           | 2.3  | 58            | 1.2  | 37         | 1.2  | 49         | 1.1  | 67          | 1.2  |
| Myocardial infarction    | 87           | 2.2  | 98            | 2.0  | 66         | 2.1  | 84         | 2.0  | 112         | 1.9  |
| Heart failure            | 40           | 1.0  | 47            | 1.0  | 28         | 0.9  | 42         | 1.0  | 53          | 0.9  |
| Stroke                   | 156          | 3.9  | 166           | 3.4  | 117        | 3.7  | 139        | 3.3  | 194         | 3.3  |

Table S6. The hospital admission rate for non-COVID-19 diseases per one million person-month during each period, by age and sex

| Admission rate per one million-month |       | Pre-pandemic | Post-pandemic |            |            |             |
|--------------------------------------|-------|--------------|---------------|------------|------------|-------------|
|                                      |       |              | Total         | First peak | First year | Second year |
| Female                               | < 5   | 6884.82      | 6435.23       | 3176.95    | 4980.98    | 7889.48     |
|                                      | 5_14  | 2260.24      | 1478.72       | 641.50     | 1193.78    | 1763.66     |
|                                      | 15-44 | 4239.55      | 6206.66       | 4001.45    | 5438.39    | 6974.93     |
|                                      | 45-64 | 5618.92      | 6767.21       | 1806.52    | 5026.23    | 8508.19     |
|                                      | ≥ 65  | 16148.99     | 15316.89      | 4879.94    | 11712.73   | 18921.05    |
| Male                                 | < 5   | 8621.08      | 8057.61       | 3725.42    | 6150.67    | 9964.56     |
|                                      | 5_14  | 3049.13      | 2098.98       | 900.82     | 1727.25    | 2470.71     |
|                                      | 15-44 | 2075.70      | 2671.93       | 1047.52    | 2133.92    | 3209.94     |
|                                      | 45-64 | 5588.32      | 6963.87       | 2263.71    | 5378.18    | 8549.55     |
|                                      | ≥ 65  | 16665.19     | 17117.32      | 6119.64    | 13573.13   | 20661.51    |

Table S7. The standardized hospital admission rate for non-COVID-19 diseases per million person-month during each period, by type of disease

| Admission rate per million person -month | Pre-pandemic | Post -pandemic |            |            |             |
|------------------------------------------|--------------|----------------|------------|------------|-------------|
|                                          |              | Total          | First peak | First year | Second year |
| Total                                    | 7115.19      | 7311.44        | 2856.35    | 5731.53    | 8891.36     |
| <b>ICD chapters</b>                      |              |                |            |            |             |
| Infectious                               | 398.22       | 313.11         | 83.04      | 218.30     | 407.91      |
| Neoplasms                                | 218.93       | 274.87         | 82.23      | 216.91     | 332.84      |
| Blood                                    | 66.27        | 143.19         | 48.89      | 99.39      | 186.99      |
| Metabolic                                | 167.20       | 148.06         | 53.18      | 122.27     | 173.85      |
| Mental                                   | 93.84        | 86.60          | 27.81      | 74.66      | 98.53       |
| Nervous Syst.                            | 115.34       | 92.29          | 34.93      | 76.04      | 108.53      |
| Eye                                      | 352.97       | 671.30         | 15.88      | 414.26     | 928.35      |
| Ear                                      | 35.63        | 15.81          | 3.51       | 12.88      | 18.73       |
| Circulatory                              | 1085.11      | 912.47         | 354.92     | 764.30     | 1060.64     |
| Respiratory                              | 1138.24      | 329.37         | 167.92     | 257.78     | 400.96      |
| Digestive                                | 413.47       | 448.40         | 133.84     | 357.28     | 539.51      |
| Skin                                     | 59.10        | 49.85          | 13.58      | 40.51      | 59.19       |
| Musculoskeletal                          | 112.73       | 139.79         | 16.15      | 98.88      | 180.71      |
| Genitourinary                            | 487.43       | 692.16         | 227.35     | 510.44     | 873.87      |
| Pregnancy                                | 155.69       | 263.54         | 185.68     | 227.76     | 299.01      |
| Perinatal                                | 497.20       | 560.33         | 440.31     | 501.18     | 618.98      |
| Malformations                            | 63.61        | 79.29          | 25.61      | 66.96      | 91.52       |
| Abnormal symptoms                        | 664.82       | 649.69         | 238.72     | 470.72     | 828.67      |
| Injury & poisoning                       | 424.50       | 514.57         | 264.58     | 440.99     | 588.14      |
| External causes                          | 52.34        | 70.23          | 44.39      | 63.26      | 77.21       |
| Health services contact                  | 528.71       | 864.69         | 440.45     | 707.19     | 1022.20     |
| <b>Selected diseases</b>                 |              |                |            |            |             |
| Pneumonia                                | 527.62       | 126.68         | 79.25      | 97.42      | 155.96      |
| Influenza                                | 112.56       | 6.18           | 5.41       | 7.29       | 4.84        |
| COPD                                     | 185.64       | 60.89          | 29.76      | 49.67      | 72.20       |
| Myocardial infarction                    | 104.01       | 98.00          | 61.60      | 91.92      | 103.64      |
| Heart failure                            | 52.64        | 42.30          | 24.99      | 37.34      | 47.41       |
| Stroke                                   | 129.92       | 96.64          | 75.52      | 87.26      | 105.54      |

Table S8. The in-hospital mortality rate for non-COVID-19 diseases per 1000 admission-month during each period, by age and sex

| Mortality rate per 1000 admission-month |       | Pre-pandemic | Post pandemic |            |            |             |
|-----------------------------------------|-------|--------------|---------------|------------|------------|-------------|
|                                         |       |              | Total         | First peak | First year | Second year |
| Female                                  | < 5   | 14.07        | 19.99         | 40.27      | 24.31      | 17.23       |
|                                         | 5_14  | 3.59         | 5.04          | 13.27      | 5.64       | 4.64        |
|                                         | 15-44 | 3.78         | 3.06          | 3.06       | 2.90       | 3.19        |
|                                         | 45-64 | 13.64        | 17.18         | 36.55      | 18.64      | 16.32       |
|                                         | ≥ 65  | 46.23        | 52.64         | 97.69      | 58.83      | 48.83       |
| Male                                    | < 5   | 13.28        | 17.99         | 33.84      | 22.42      | 15.22       |
|                                         | 5_14  | 3.33         | 4.13          | 7.84       | 4.81       | 3.66        |
|                                         | 15-44 | 9.22         | 10.23         | 21.32      | 10.91      | 9.78        |
|                                         | 45-64 | 23.84        | 24.68         | 46.77      | 26.39      | 23.60       |
|                                         | ≥ 65  | 51.42        | 57.17         | 96.48      | 63.28      | 53.17       |

Table S9. The in-hospital mortality rate for non-COVID-19 diseases per 1000 admission-month during each period, by type of disease

| Mortality rate per<br>1000 admission-month | Pre-pandemic | Post -pandemic |            |            |             |
|--------------------------------------------|--------------|----------------|------------|------------|-------------|
|                                            |              | Total          | First peak | First year | Second year |
| Total                                      | 20.20        | 21.64          | 31.99      | 23.13      | 20.63       |
| <b>ICD chapters</b>                        |              |                |            |            |             |
| Infectious                                 | 37.64        | 43.99          | 80.94      | 47.27      | 42.11       |
| Neoplasms                                  | 49.51        | 42.83          | 65.13      | 44.63      | 41.66       |
| Blood                                      | 21.17        | 8.49           | 27.87      | 10.79      | 7.34        |
| Metabolic                                  | 24.54        | 46.17          | 71.22      | 47.11      | 45.52       |
| Mental                                     | 2.62         | 5.07           | 7.71       | 4.96       | 5.16        |
| Nervous Syst.                              | 21.73        | 30.38          | 35.49      | 31.55      | 29.56       |
| Eye                                        | 0.11         | 0.10           | 0.00       | 0.10       | 0.10        |
| Ear                                        | 0.43         | 1.01           | 0.00       | 0.84       | 1.14        |
| Circulatory                                | 46.47        | 59.82          | 112.81     | 62.38      | 58.03       |
| Respiratory                                | 21.54        | 69.96          | 97.93      | 72.68      | 68.09       |
| Digestive                                  | 17.16        | 16.89          | 28.50      | 17.86      | 16.23       |
| Skin                                       | 11.32        | 10.31          | 24.30      | 10.15      | 10.42       |
| Musculoskeletal                            | 5.86         | 9.50           | 18.71      | 10.32      | 9.02        |
| Genitourinary                              | 12.86        | 9.81           | 20.14      | 11.48      | 8.85        |
| Pregnancy                                  | 0.20         | 0.21           | 0.17       | 0.21       | 0.21        |
| Perinatal                                  | 22.65        | 28.58          | 38.87      | 30.87      | 26.73       |
| Malformations                              | 36.32        | 35.77          | 113.31     | 39.71      | 32.98       |
| Abnormal symptoms                          | 28.73        | 44.87          | 58.44      | 50.35      | 41.75       |
| Injury & poisoning                         | 12.18        | 13.12          | 18.98      | 13.60      | 12.76       |
| External causes                            | 22.89        | 12.12          | 14.48      | 14.05      | 10.53       |
| Health services contact                    | 5.66         | 7.45           | 10.89      | 8.69       | 6.47        |
| <b>Selected diseases</b>                   |              |                |            |            |             |
| Pneumonia                                  | 18.53        | 70.03          | 93.48      | 75.25      | 66.40       |
| Influenza                                  | 11.59        | 24.92          | 27.40      | 28.68      | 15.52       |
| COPD                                       | 24.71        | 44.24          | 57.81      | 46.17      | 42.92       |
| Myocardial infarction                      | 52.56        | 59.99          | 62.03      | 56.70      | 62.71       |
| Heart failure                              | 43.75        | 65.74          | 79.77      | 65.52      | 65.91       |
| Stroke                                     | 85.54        | 103.44         | 126.90     | 99.66      | 106.32      |

Table S10. The Incidence Rate Ratio of non-COVID-19 hospital admissions at the first peak of COVID-19 compared with the pre-pandemic period, by age and sex

| Sex    | Age group | Incidence Rate Ratio | 95% confidence interval |             | P value | Adjusted P value |
|--------|-----------|----------------------|-------------------------|-------------|---------|------------------|
|        |           |                      | Lower bound             | Upper bound |         |                  |
| Female | < 5       | 0.46                 | 0.26                    | 0.81        | 0.01    | 0.02             |
|        | 5_14      | 0.28                 | 0.16                    | 0.49        | 0.00    | 0.00             |
|        | 15-44     | 0.94                 | 0.55                    | 1.62        | 0.84    | 0.87             |
|        | 45-64     | 0.32                 | 0.21                    | 0.48        | 0.00    | 0.00             |
|        | ≥ 65      | 0.30                 | 0.22                    | 0.42        | 0.00    | 0.00             |
| Male   | < 5       | 0.43                 | 0.25                    | 0.74        | 0.00    | 0.00             |
|        | 5_14      | 0.30                 | 0.19                    | 0.46        | 0.00    | 0.00             |
|        | 15-44     | 0.50                 | 0.35                    | 0.72        | 0.00    | 0.00             |
|        | 45-64     | 0.41                 | 0.29                    | 0.57        | 0.00    | 0.00             |
|        | ≥ 65      | 0.37                 | 0.26                    | 0.51        | 0.00    | 0.00             |

Table S11. The adjusted Incidence Rate Ratio of non-COVID-19 hospital admissions at the first peak of COVID-19 compared with the pre-pandemic period, by type of disease

|                          | Incidence Rate Ratio | 95% confidence interval |             | P value | Adjusted P value |
|--------------------------|----------------------|-------------------------|-------------|---------|------------------|
|                          |                      | Lower bound             | Upper bound |         |                  |
| Total non-COVID_19       | 0.40                 | 0.25                    | 0.64        | 0.00    | 0.00             |
| <b>ICD chapters</b>      |                      |                         |             |         |                  |
| Infectious               | 0.21                 | 0.11                    | 0.40        | 0.00    | 0.00             |
| Neoplasms                | 0.38                 | 0.18                    | 0.78        | 0.01    | 0.02             |
| Blood                    | 0.74                 | 0.49                    | 1.11        | 0.15    | 0.19             |
| Metabolic                | 0.32                 | 0.16                    | 0.62        | 0.00    | 0.00             |
| Mental                   | 0.30                 | 0.12                    | 0.72        | 0.01    | 0.02             |
| Nervous Syst.            | 0.30                 | 0.19                    | 0.47        | 0.00    | 0.00             |
| Eye                      | 0.04                 | 0.02                    | 0.11        | 0.00    | 0.00             |
| Ear                      | 0.09                 | 0.05                    | 0.16        | 0.00    | 0.00             |
| Circulatory              | 0.33                 | 0.11                    | 0.98        | 0.05    | 0.07             |
| Respiratory              | 0.15                 | 0.08                    | 0.28        | 0.00    | 0.00             |
| Digestive                | 0.32                 | 0.20                    | 0.54        | 0.00    | 0.00             |
| Skin                     | 0.23                 | 0.15                    | 0.35        | 0.00    | 0.00             |
| Musculoskeletal          | 0.14                 | 0.08                    | 0.26        | 0.00    | 0.00             |
| Genitourinary            | 0.47                 | 0.24                    | 0.89        | 0.02    | 0.03             |
| Pregnancy                | 1.19                 | 0.29                    | 4.85        | 0.81    | 0.84             |
| Perinatal                | 0.89                 | 0.17                    | 4.60        | 0.89    | 0.91             |
| Malformations            | 0.40                 | 0.15                    | 1.06        | 0.07    | 0.09             |
| Abnormal symptoms        | 0.36                 | 0.22                    | 0.58        | 0.00    | 0.00             |
| Injury & poisoning       | 0.62                 | 0.44                    | 0.89        | 0.01    | 0.02             |
| External causes          | 0.85                 | 0.58                    | 1.24        | 0.41    | 0.48             |
| Health services contact  | 0.83                 | 0.49                    | 1.42        | 0.51    | 0.58             |
| <b>Selected diseases</b> |                      |                         |             |         |                  |
| Pneumonia                | 0.15                 | 0.07                    | 0.30        | 0.00    | 0.00             |
| Influenza                | 0.05                 | 0.02                    | 0.10        | 0.00    | 0.00             |
| COPD                     | 0.16                 | 0.06                    | 0.46        | 0.00    | 0.00             |
| Myocardial infarction    | 0.59                 | 0.16                    | 2.17        | 0.43    | 0.50             |
| Heart failure            | 0.47                 | 0.12                    | 1.90        | 0.29    | 0.35             |
| Stroke                   | 0.58                 | 0.14                    | 2.41        | 0.46    | 0.53             |

Table S12. The Odds Ratio of non-COVID-19 in-hospital mortality at the first peak of COVID-19 compared with the pre-pandemic period, by age and sex

| Sex    | Age group | Odds Ratio | 95% confidence interval |             | P value | Adjusted P value |
|--------|-----------|------------|-------------------------|-------------|---------|------------------|
|        |           |            | Lower bound             | Upper bound |         |                  |
| Female | < 5       | 2.94       | 2.46                    | 3.51        | 0.00    | 0.00             |
|        | 5_14      | 3.73       | 2.48                    | 5.63        | 0.00    | 0.00             |
|        | 15-44     | 0.81       | 0.67                    | 0.98        | 0.03    | 0.04             |
|        | 45-64     | 2.74       | 2.41                    | 3.13        | 0.00    | 0.00             |
|        | ≥ 65      | 2.23       | 2.07                    | 2.41        | 0.00    | 0.00             |
| Male   | < 5       | 2.60       | 2.20                    | 3.07        | 0.00    | 0.00             |
|        | 5_14      | 2.37       | 1.55                    | 3.61        | 0.00    | 0.00             |
|        | 15-44     | 2.34       | 2.03                    | 2.69        | 0.00    | 0.00             |
|        | 45-64     | 2.01       | 1.81                    | 2.23        | 0.00    | 0.00             |
|        | ≥ 65      | 1.97       | 1.83                    | 2.12        | 0.00    | 0.00             |

Table S13. The adjusted Odds Ratio of non-COVID-19 in-hospital mortality at the first peak of COVID-19 compared with the pre-pandemic period, by type of disease

|                          | Odds Ratio | 95% confidence interval |             | P value | Adjusted P value |
|--------------------------|------------|-------------------------|-------------|---------|------------------|
|                          |            | Lower bound             | Upper bound |         |                  |
| Total non-COVID_19       | 2.05       | 1.97                    | 2.13        | 0.00    | 0.00             |
| <b>ICD chapters</b>      |            |                         |             |         |                  |
| Infectious               | 1.91       | 1.58                    | 2.30        | 0.00    | 0.00             |
| Neoplasms                | 1.45       | 1.22                    | 1.72        | 0.00    | 0.00             |
| Blood                    | 1.58       | 1.12                    | 2.25        | 0.01    | 0.02             |
| Metabolic                | 3.10       | 2.47                    | 3.88        | 0.00    | 0.00             |
| Mental                   | 3.18       | 1.74                    | 5.82        | 0.00    | 0.00             |
| Nervous Syst.            | 1.56       | 1.09                    | 2.23        | 0.02    | 0.03             |
| Circulatory              | 2.62       | 2.43                    | 2.82        | 0.00    | 0.00             |
| Respiratory              | 3.28       | 2.93                    | 3.68        | 0.00    | 0.00             |
| Digestive                | 1.96       | 1.62                    | 2.35        | 0.00    | 0.00             |
| Skin                     | 2.51       | 1.39                    | 4.56        | 0.00    | 0.00             |
| Musculoskeletal          | 3.74       | 1.99                    | 7.03        | 0.00    | 0.00             |
| Genitourinary            | 1.39       | 1.16                    | 1.68        | 0.00    | 0.00             |
| Pregnancy                | 1.06       | 0.30                    | 3.75        | 0.93    | 0.95             |
| Perinatal                | 1.74       | 1.49                    | 2.04        | 0.00    | 0.00             |
| Malformations            | 2.21       | 1.54                    | 3.16        | 0.00    | 0.00             |
| Abnormal symptoms        | 1.93       | 1.72                    | 2.16        | 0.00    | 0.00             |
| Injury & poisoning       | 1.73       | 1.49                    | 2.02        | 0.00    | 0.00             |
| External causes          | 0.65       | 0.43                    | 0.98        | 0.04    | 0.06             |
| Health services contact  | 2.62       | 2.25                    | 3.04        | 0.00    | 0.00             |
| <b>Selected diseases</b> |            |                         |             |         |                  |
| Pneumonia                | 3.36       | 2.83                    | 4.00        | 0.00    | 0.00             |
| Influenza                | 1.36       | 0.49                    | 3.73        | 0.56    | 0.63             |
| COPD                     | 2.42       | 1.71                    | 3.42        | 0.00    | 0.00             |
| Myocardial infarction    | 1.31       | 1.00                    | 1.71        | 0.05    | 0.07             |
| Heart failure            | 1.90       | 1.26                    | 2.87        | 0.00    | 0.00             |
| Stroke                   | 1.59       | 1.29                    | 1.96        | 0.00    | 0.00             |

Table S14. The Incidence Rate Ratio of non-COVID-19 hospital admissions in the first year of COVID-19 compared with the pre-pandemic period, by age and sex

| Sex    | Age group | Incidence Rate Ratio | 95% confidence interval |             | P value | Adjusted P value |
|--------|-----------|----------------------|-------------------------|-------------|---------|------------------|
|        |           |                      | Lower bound             | Upper bound |         |                  |
| Female | < 5       | 0.72                 | 0.58                    | 0.90        | 0.00    | 0.00             |
|        | 5_14      | 0.53                 | 0.42                    | 0.67        | 0.00    | 0.00             |
|        | 15-44     | 1.28                 | 1.06                    | 1.55        | 0.01    | 0.02             |
|        | 45-64     | 0.89                 | 0.65                    | 1.24        | 0.50    | 0.57             |
|        | ≥ 65      | 0.73                 | 0.55                    | 0.96        | 0.02    | 0.03             |
| Male   | < 5       | 0.71                 | 0.57                    | 0.89        | 0.00    | 0.00             |
|        | 5_14      | 0.57                 | 0.46                    | 0.70        | 0.00    | 0.00             |
|        | 15-44     | 1.03                 | 0.81                    | 1.31        | 0.82    | 0.85             |
|        | 45-64     | 0.96                 | 0.73                    | 1.27        | 0.79    | 0.83             |
|        | ≥ 65      | 0.81                 | 0.63                    | 1.05        | 0.11    | 0.14             |

Table S15. The adjusted Incidence Rate Ratio of non-COVID-19 hospital admissions in the first year of COVID-19 compared with the pre-pandemic period, by type of disease

|                          | Incidence Rate Ratio | 95% confidence interval |             | P value | Adjusted P value |
|--------------------------|----------------------|-------------------------|-------------|---------|------------------|
|                          |                      | Lower bound             | Upper bound |         |                  |
| Total non-COVID_19       | 0.80                 | 0.73                    | 0.89        | 0.00    | 0.00             |
| <b>ICD chapters</b>      |                      |                         |             |         |                  |
| Infectious               | 0.55                 | 0.40                    | 0.76        | 0.00    | 0.00             |
| Neoplasms                | 0.99                 | 0.70                    | 1.40        | 0.96    | 0.97             |
| Blood                    | 1.50                 | 1.24                    | 1.83        | 0.00    | 0.00             |
| Metabolic                | 0.73                 | 0.53                    | 1.01        | 0.06    | 0.08             |
| Mental                   | 0.80                 | 0.52                    | 1.22        | 0.30    | 0.36             |
| Nervous Syst.            | 0.66                 | 0.53                    | 0.81        | 0.00    | 0.00             |
| Eye                      | 1.17                 | 0.72                    | 1.91        | 0.52    | 0.59             |
| Ear                      | 0.36                 | 0.28                    | 0.46        | 0.00    | 0.00             |
| Circulatory              | 0.70                 | 0.42                    | 1.19        | 0.19    | 0.24             |
| Respiratory              | 0.23                 | 0.17                    | 0.31        | 0.00    | 0.00             |
| Digestive                | 0.86                 | 0.68                    | 1.10        | 0.23    | 0.29             |
| Skin                     | 0.69                 | 0.56                    | 0.84        | 0.00    | 0.00             |
| Musculoskeletal          | 0.88                 | 0.64                    | 1.21        | 0.43    | 0.50             |
| Genitourinary            | 1.05                 | 0.75                    | 1.45        | 0.78    | 0.83             |
| Pregnancy                | 1.46                 | 0.73                    | 2.93        | 0.28    | 0.34             |
| Perinatal                | 1.01                 | 0.46                    | 2.21        | 0.98    | 0.98             |
| Malformations            | 1.05                 | 0.66                    | 1.68        | 0.83    | 0.86             |
| Abnormal symptoms        | 0.71                 | 0.55                    | 0.91        | 0.01    | 0.02             |
| Injury & poisoning       | 1.04                 | 0.89                    | 1.22        | 0.63    | 0.69             |
| External causes          | 1.21                 | 1.00                    | 1.46        | 0.05    | 0.07             |
| Health services contact  | 1.34                 | 1.02                    | 1.76        | 0.04    | 0.06             |
| <b>Selected diseases</b> |                      |                         |             |         |                  |
| Pneumonia                | 0.18                 | 0.13                    | 0.26        | 0.00    | 0.00             |
| Influenza                | 0.06                 | 0.04                    | 0.10        | 0.00    | 0.00             |
| COPD                     | 0.27                 | 0.16                    | 0.46        | 0.00    | 0.00             |
| Myocardial infarction    | 0.88                 | 0.49                    | 1.60        | 0.68    | 0.73             |
| Heart failure            | 0.71                 | 0.40                    | 1.27        | 0.25    | 0.31             |
| Stroke                   | 0.67                 | 0.35                    | 1.27        | 0.22    | 0.27             |

Table S16. The Odds Ratio of non-COVID-19 in-hospital mortality in the first year of COVID-19 compared with the pre-pandemic period, by age and sex

| Sex    | Age group | Odds Ratio | 95% confidence interval |             | P value | Adjusted P value |
|--------|-----------|------------|-------------------------|-------------|---------|------------------|
|        |           |            | Lower bound             | Upper bound |         |                  |
| Female | < 5       | 1.75       | 1.60                    | 1.91        | 0.00    | 0.00             |
|        | 5_14      | 1.57       | 1.28                    | 1.94        | 0.00    | 0.00             |
|        | 15-44     | 0.77       | 0.71                    | 0.83        | 0.00    | 0.00             |
|        | 45-64     | 1.37       | 1.30                    | 1.46        | 0.00    | 0.00             |
|        | ≥ 65      | 1.29       | 1.25                    | 1.33        | 0.00    | 0.00             |
| Male   | < 5       | 1.70       | 1.58                    | 1.84        | 0.00    | 0.00             |
|        | 5_14      | 1.45       | 1.21                    | 1.74        | 0.00    | 0.00             |
|        | 15-44     | 1.19       | 1.10                    | 1.27        | 0.00    | 0.00             |
|        | 45-64     | 1.11       | 1.06                    | 1.16        | 0.00    | 0.00             |
|        | ≥ 65      | 1.25       | 1.21                    | 1.28        | 0.00    | 0.00             |

Table S17. The adjusted Odds Ratio of non-COVID-19 in-hospital mortality in the first year of COVID-19 compared with the pre-pandemic period, by type of disease

|                          | Odds Ratio | 95% confidence interval |             | P value | Adjusted P value |
|--------------------------|------------|-------------------------|-------------|---------|------------------|
|                          |            | Lower bound             | Upper bound |         |                  |
| Total non-COVID_19       | 1.26       | 1.23                    | 1.28        | 0.00    | 0.00             |
| <b>ICD chapters</b>      |            |                         |             |         |                  |
| Infectious               | 1.01       | 0.95                    | 1.08        | 0.71    | 0.76             |
| Neoplasms                | 0.93       | 0.87                    | 0.99        | 0.02    | 0.03             |
| Blood                    | 0.80       | 0.68                    | 0.95        | 0.01    | 0.02             |
| Metabolic                | 2.03       | 1.83                    | 2.24        | 0.00    | 0.00             |
| Mental                   | 2.05       | 1.57                    | 2.68        | 0.00    | 0.00             |
| Nervous Syst.            | 1.52       | 1.34                    | 1.71        | 0.00    | 0.00             |
| Circulatory              | 1.42       | 1.38                    | 1.47        | 0.00    | 0.00             |
| Respiratory              | 2.81       | 2.68                    | 2.95        | 0.00    | 0.00             |
| Digestive                | 1.16       | 1.08                    | 1.24        | 0.00    | 0.00             |
| Skin                     | 1.17       | 0.93                    | 1.47        | 0.17    | 0.22             |
| Musculoskeletal          | 1.78       | 1.44                    | 2.20        | 0.00    | 0.00             |
| Genitourinary            | 0.89       | 0.82                    | 0.96        | 0.00    | 0.00             |
| Pregnancy                | 1.15       | 0.63                    | 2.07        | 0.65    | 0.70             |
| Perinatal                | 1.37       | 1.27                    | 1.49        | 0.00    | 0.00             |
| Malformations            | 0.95       | 0.82                    | 1.11        | 0.55    | 0.62             |
| Abnormal symptoms        | 1.57       | 1.50                    | 1.64        | 0.00    | 0.00             |
| Injury & poisoning       | 1.18       | 1.10                    | 1.27        | 0.00    | 0.00             |
| External causes          | 0.62       | 0.52                    | 0.74        | 0.00    | 0.00             |
| Health services contact  | 1.63       | 1.50                    | 1.78        | 0.00    | 0.00             |
| <b>Selected diseases</b> |            |                         |             |         |                  |
| Pneumonia                | 3.10       | 2.86                    | 3.36        | 0.00    | 0.00             |
| Influenza                | 1.85       | 1.41                    | 2.43        | 0.00    | 0.00             |
| COPD                     | 1.94       | 1.71                    | 2.20        | 0.00    | 0.00             |
| Myocardial infarction    | 1.16       | 1.03                    | 1.30        | 0.02    | 0.03             |
| Heart failure            | 1.55       | 1.31                    | 1.84        | 0.00    | 0.00             |
| Stroke                   | 1.22       | 1.12                    | 1.34        | 0.00    | 0.00             |

Table S18. The Incidence Rate Ratio of non-COVID-19 hospital admissions in the second year of COVID-19 compared with the pre-pandemic period, by age and sex

| Sex    | Age group | Incidence Rate Ratio | 95% confidence interval |             | P value | Adjusted P value |
|--------|-----------|----------------------|-------------------------|-------------|---------|------------------|
|        |           |                      | Lower bound             | Upper bound |         |                  |
| Female | < 5       | 1.15                 | 0.83                    | 1.57        | 0.40    | 0.47             |
|        | 5_14      | 0.78                 | 0.60                    | 1.01        | 0.06    | 0.08             |
|        | 15-44     | 1.65                 | 1.22                    | 2.22        | 0.00    | 0.00             |
|        | 45-64     | 1.51                 | 1.16                    | 1.97        | 0.00    | 0.00             |
|        | ≥ 65      | 1.17                 | 0.86                    | 1.60        | 0.32    | 0.38             |
| Male   | < 5       | 1.16                 | 0.84                    | 1.59        | 0.37    | 0.44             |
|        | 5_14      | 0.80                 | 0.61                    | 1.06        | 0.12    | 0.15             |
|        | 15-44     | 1.55                 | 1.20                    | 2.00        | 0.00    | 0.00             |
|        | 45-64     | 1.52                 | 1.13                    | 2.03        | 0.01    | 0.02             |
|        | ≥ 65      | 1.24                 | 0.90                    | 1.70        | 0.18    | 0.23             |

Table S19. The adjusted Incidence Rate Ratio of non-COVID-19 hospital admissions in the second year of COVID-19 compared with the pre-pandemic period, by type of disease

|                          | Incidence Rate Ratio | 95% confidence interval |             | P value | Adjusted P value |
|--------------------------|----------------------|-------------------------|-------------|---------|------------------|
|                          |                      | Lower bound             | Upper bound |         |                  |
| Total non-COVID_19       | 1.25                 | 1.13                    | 1.40        | 0.00    | 0.00             |
| <b>ICD chapters</b>      |                      |                         |             |         |                  |
| Infectious               | 1.02                 | 0.73                    | 1.44        | 0.89    | 0.91             |
| Neoplasms                | 1.52                 | 1.09                    | 2.13        | 0.01    | 0.02             |
| Blood                    | 2.84                 | 2.42                    | 3.33        | 0.00    | 0.00             |
| Metabolic                | 1.04                 | 0.76                    | 1.43        | 0.80    | 0.84             |
| Mental                   | 1.05                 | 0.70                    | 1.57        | 0.81    | 0.84             |
| Nervous Syst.            | 0.94                 | 0.76                    | 1.16        | 0.57    | 0.64             |
| Eye                      | 2.63                 | 1.62                    | 4.27        | 0.00    | 0.00             |
| Ear                      | 0.52                 | 0.41                    | 0.66        | 0.00    | 0.00             |
| Circulatory              | 0.98                 | 0.58                    | 1.64        | 0.93    | 0.95             |
| Respiratory              | 0.35                 | 0.26                    | 0.47        | 0.00    | 0.00             |
| Digestive                | 1.30                 | 1.04                    | 1.64        | 0.02    | 0.03             |
| Skin                     | 1.00                 | 0.83                    | 1.21        | 0.97    | 0.98             |
| Musculoskeletal          | 1.60                 | 1.17                    | 2.20        | 0.00    | 0.00             |
| Genitourinary            | 1.79                 | 1.30                    | 2.49        | 0.00    | 0.00             |
| Pregnancy                | 1.92                 | 0.96                    | 3.85        | 0.07    | 0.09             |
| Perinatal                | 1.24                 | 0.58                    | 2.69        | 0.58    | 0.65             |
| Malformations            | 1.44                 | 0.93                    | 2.23        | 0.11    | 0.14             |
| Abnormal symptoms        | 1.25                 | 0.98                    | 1.58        | 0.07    | 0.09             |
| Injury & poisoning       | 1.39                 | 1.20                    | 1.60        | 0.00    | 0.00             |
| External causes          | 1.48                 | 1.22                    | 1.79        | 0.00    | 0.00             |
| Health services contact  | 1.93                 | 1.50                    | 2.50        | 0.00    | 0.00             |
| <b>Selected diseases</b> |                      |                         |             |         |                  |
| Pneumonia                | 0.30                 | 0.21                    | 0.42        | 0.00    | 0.00             |
| Influenza                | 0.04                 | 0.03                    | 0.06        | 0.00    | 0.00             |
| COPD                     | 0.39                 | 0.23                    | 0.65        | 0.00    | 0.00             |
| Myocardial infarction    | 1.00                 | 0.55                    | 1.80        | 0.99    | 0.99             |
| Heart failure            | 0.90                 | 0.50                    | 1.63        | 0.73    | 0.78             |
| Stroke                   | 0.81                 | 0.43                    | 1.54        | 0.52    | 0.59             |

Table S20. The Odds Ratio of non-COVID-19 in-hospital mortality in the second year of COVID-19 compared with the pre-pandemic period, by age and sex

| Sex    | Age group | Odds Ratio | 95% confidence interval |             | P value | Adjusted P value |
|--------|-----------|------------|-------------------------|-------------|---------|------------------|
|        |           |            | Lower bound             | Upper bound |         |                  |
| Female | < 5       | 1.22       | 1.12                    | 1.34        | 0.00    | 0.00             |
|        | 5_14      | 1.29       | 1.06                    | 1.59        | 0.01    | 0.02             |
|        | 15-44     | 0.84       | 0.78                    | 0.91        | 0.00    | 0.00             |
|        | 45-64     | 1.20       | 1.13                    | 1.27        | 0.00    | 0.00             |
|        | ≥ 65      | 1.06       | 1.03                    | 1.10        | 0.00    | 0.00             |
| Male   | < 5       | 1.15       | 1.06                    | 1.24        | 0.00    | 0.00             |
|        | 5_14      | 1.10       | 0.92                    | 1.32        | 0.26    | 0.32             |
|        | 15-44     | 1.06       | 0.99                    | 1.14        | 0.09    | 0.12             |
|        | 45-64     | 0.99       | 0.95                    | 1.03        | 0.66    | 0.71             |
|        | ≥ 65      | 1.04       | 1.00                    | 1.07        | 0.02    | 0.03             |

Table S21. The adjusted Odds Ratio of non-COVID-19 in-hospital mortality in the second year of COVID-19 compared with the pre-pandemic period, by type of disease

|                          | Odds Ratio | 95% confidence interval |             | P value | Adjusted P value |
|--------------------------|------------|-------------------------|-------------|---------|------------------|
|                          |            | Lower bound             | Upper bound |         |                  |
| Total non-COVID_19       | 1.05       | 1.04                    | 1.07        | 0.00    | 0.00             |
| <b>ICD chapters</b>      |            |                         |             |         |                  |
| Infectious               | 1.04       | 0.98                    | 1.10        | 0.22    | 0.27             |
| Neoplasms                | 0.87       | 0.82                    | 0.93        | 0.00    | 0.00             |
| Blood                    | 0.73       | 0.62                    | 0.86        | 0.00    | 0.00             |
| Metabolic                | 1.99       | 1.80                    | 2.19        | 0.00    | 0.00             |
| Mental                   | 2.15       | 1.65                    | 2.78        | 0.00    | 0.00             |
| Nervous Syst.            | 1.42       | 1.26                    | 1.60        | 0.00    | 0.00             |
| Circulatory              | 1.35       | 1.31                    | 1.39        | 0.00    | 0.00             |
| Respiratory              | 2.95       | 2.82                    | 3.09        | 0.00    | 0.00             |
| Digestive                | 1.04       | 0.97                    | 1.12        | 0.26    | 0.32             |
| Skin                     | 1.21       | 0.98                    | 1.49        | 0.08    | 0.11             |
| Musculoskeletal          | 1.48       | 1.20                    | 1.82        | 0.00    | 0.00             |
| Genitourinary            | 0.69       | 0.64                    | 0.75        | 0.00    | 0.00             |
| Pregnancy                | 1.17       | 0.66                    | 2.09        | 0.59    | 0.65             |
| Perinatal                | 1.19       | 1.10                    | 1.28        | 0.00    | 0.00             |
| Malformations            | 0.82       | 0.71                    | 0.95        | 0.01    | 0.02             |
| Abnormal symptoms        | 1.37       | 1.31                    | 1.43        | 0.00    | 0.00             |
| Injury & poisoning       | 1.12       | 1.04                    | 1.20        | 0.00    | 0.00             |
| External causes          | 0.45       | 0.38                    | 0.54        | 0.00    | 0.00             |
| Health services contact  | 0.99       | 0.90                    | 1.08        | 0.76    | 0.81             |
| <b>Selected diseases</b> |            |                         |             |         |                  |
| Pneumonia                | 3.64       | 3.37                    | 3.93        | 0.00    | 0.00             |
| Influenza                | 1.42       | 0.85                    | 2.40        | 0.18    | 0.23             |
| COPD                     | 1.82       | 1.62                    | 2.05        | 0.00    | 0.00             |
| Myocardial infarction    | 1.33       | 1.19                    | 1.49        | 0.00    | 0.00             |
| Heart failure            | 1.59       | 1.35                    | 1.87        | 0.00    | 0.00             |
| Stroke                   | 1.35       | 1.24                    | 1.47        | 0.00    | 0.00             |

Table S22. The Incidence Rate Ratio of non-COVID-19 hospital admissions in the second year of COVID-19 compared with the first year, by age and sex

| Sex    | Age group | Incidence Rate Ratio | 95% confidence interval |             | P value | Adjusted P value |
|--------|-----------|----------------------|-------------------------|-------------|---------|------------------|
|        |           |                      | Lower bound             | Upper bound |         |                  |
| Female | < 5       | 1.58                 | 1.25                    | 2.01        | 0.00    | 0.00             |
|        | 5_14      | 1.48                 | 1.22                    | 1.79        | 0.00    | 0.00             |
|        | 15-44     | 1.28                 | 1.01                    | 1.64        | 0.05    | 0.07             |
|        | 45-64     | 1.69                 | 1.38                    | 2.08        | 0.00    | 0.00             |
|        | ≥ 65      | 1.62                 | 1.27                    | 2.05        | 0.00    | 0.00             |
| Male   | < 5       | 1.62                 | 1.28                    | 2.05        | 0.00    | 0.00             |
|        | 5_14      | 1.43                 | 1.16                    | 1.78        | 0.00    | 0.00             |
|        | 15-44     | 1.50                 | 1.23                    | 1.84        | 0.00    | 0.00             |
|        | 45-64     | 1.58                 | 1.26                    | 1.99        | 0.00    | 0.00             |
|        | ≥ 65      | 1.51                 | 1.19                    | 1.92        | 0.00    | 0.00             |

Table S23. The adjusted Incidence Rate Ratio of non-COVID-19 hospital admissions in the second year of COVID-19 compared with the first year, by type of disease

|                          | Incidence Rate Ratio | 95% confidence interval |             | P value | Adjusted P value |
|--------------------------|----------------------|-------------------------|-------------|---------|------------------|
|                          |                      | Lower bound             | Upper bound |         |                  |
| Total non-COVID_19       | 1.55                 | 1.43                    | 1.67        | 0.00    | 0.00             |
| <b>ICD chapters</b>      |                      |                         |             |         |                  |
| Infectious               | 1.87                 | 1.44                    | 2.42        | 0.00    | 0.00             |
| Neoplasms                | 1.53                 | 1.20                    | 1.97        | 0.00    | 0.00             |
| Blood                    | 1.88                 | 1.65                    | 2.14        | 0.00    | 0.00             |
| Metabolic                | 1.42                 | 1.12                    | 1.81        | 0.00    | 0.00             |
| Mental                   | 1.32                 | 0.96                    | 1.81        | 0.08    | 0.11             |
| Nervous Syst.            | 1.43                 | 1.22                    | 1.67        | 0.00    | 0.00             |
| Eye                      | 2.24                 | 1.54                    | 3.26        | 0.00    | 0.00             |
| Ear                      | 1.46                 | 1.21                    | 1.76        | 0.00    | 0.00             |
| Circulatory              | 1.39                 | 0.93                    | 2.07        | 0.12    | 0.15             |
| Respiratory              | 1.56                 | 1.23                    | 1.97        | 0.00    | 0.00             |
| Digestive                | 1.51                 | 1.27                    | 1.80        | 0.00    | 0.00             |
| Skin                     | 1.46                 | 1.26                    | 1.70        | 0.00    | 0.00             |
| Musculoskeletal          | 1.83                 | 1.43                    | 2.34        | 0.00    | 0.00             |
| Genitourinary            | 1.71                 | 1.32                    | 2.21        | 0.00    | 0.00             |
| Pregnancy                | 1.31                 | 0.77                    | 2.24        | 0.32    | 0.38             |
| Perinatal                | 1.24                 | 0.68                    | 2.24        | 0.49    | 0.56             |
| Malformations            | 1.37                 | 0.96                    | 1.95        | 0.08    | 0.11             |
| Abnormal symptoms        | 1.76                 | 1.45                    | 2.13        | 0.00    | 0.00             |
| Injury & poisoning       | 1.33                 | 1.20                    | 1.48        | 0.00    | 0.00             |
| External causes          | 1.22                 | 1.05                    | 1.41        | 0.02    | 0.03             |
| Health services contact  | 1.44                 | 1.17                    | 1.78        | 0.00    | 0.00             |
| <b>Selected diseases</b> |                      |                         |             |         |                  |
| Pneumonia                | 1.60                 | 1.21                    | 2.12        | 0.00    | 0.00             |
| Influenza                | 0.65                 | 0.44                    | 0.98        | 0.03    | 0.04             |
| COPD                     | 1.45                 | 0.97                    | 2.19        | 0.07    | 0.09             |
| Myocardial infarction    | 1.12                 | 0.72                    | 1.76        | 0.60    | 0.66             |
| Heart failure            | 1.27                 | 0.81                    | 2.00        | 0.30    | 0.36             |
| Stroke                   | 1.21                 | 0.75                    | 1.95        | 0.43    | 0.50             |

Table S24. The Odds Ratio of non-COVID-19 in-hospital mortality in the second year of COVID-19 compared with the first year, by age and sex

| Sex    | Age group | Odds Ratio | 95% confidence interval |             | P value | Adjusted P value |
|--------|-----------|------------|-------------------------|-------------|---------|------------------|
|        |           |            | Lower bound             | Upper bound |         |                  |
| Female | < 5       | 0.70       | 0.66                    | 0.75        | 0.00    | 0.00             |
|        | 5_14      | 0.82       | 0.70                    | 0.97        | 0.04    | 0.06             |
|        | 15-44     | 1.10       | 1.04                    | 1.17        | 0.00    | 0.00             |
|        | 45-64     | 0.87       | 0.84                    | 0.91        | 0.00    | 0.00             |
|        | ≥ 65      | 0.82       | 0.80                    | 0.84        | 0.00    | 0.00             |
| Male   | < 5       | 0.67       | 0.64                    | 0.71        | 0.00    | 0.00             |
|        | 5_14      | 0.76       | 0.66                    | 0.88        | 0.00    | 0.00             |
|        | 15-44     | 0.90       | 0.85                    | 0.94        | 0.00    | 0.00             |
|        | 45-64     | 0.89       | 0.86                    | 0.92        | 0.00    | 0.00             |
|        | ≥ 65      | 0.83       | 0.81                    | 0.85        | 0.00    | 0.00             |

Table S25. The adjusted Odds Ratio of non-COVID-19 in-hospital mortality in the second year of COVID-19 compared with the first year, by type of disease

|                          | Odds Ratio | 95% confidence interval |             | P value | Adjusted P value |
|--------------------------|------------|-------------------------|-------------|---------|------------------|
|                          |            | Lower bound             | Upper bound |         |                  |
| Total non-COVID_19       | 0.85       | 0.84                    | 0.86        | 0.00    | 0.00             |
| <b>ICD chapters</b>      |            |                         |             |         |                  |
| Infectious               | 1.02       | 0.97                    | 1.08        | 0.44    | 0.51             |
| Neoplasms                | 0.94       | 0.90                    | 0.98        | 0.00    | 0.00             |
| Blood                    | 0.84       | 0.75                    | 0.94        | 0.00    | 0.00             |
| Metabolic                | 0.98       | 0.92                    | 1.05        | 0.60    | 0.66             |
| Mental                   | 1.04       | 0.89                    | 1.22        | 0.61    | 0.67             |
| Nervous Syst.            | 0.93       | 0.85                    | 1.02        | 0.11    | 0.14             |
| Circulatory              | 0.94       | 0.92                    | 0.97        | 0.00    | 0.00             |
| Respiratory              | 1.06       | 1.02                    | 1.10        | 0.00    | 0.00             |
| Digestive                | 0.90       | 0.85                    | 0.95        | 0.00    | 0.00             |
| Skin                     | 1.05       | 0.88                    | 1.25        | 0.62    | 0.68             |
| Musculoskeletal          | 0.83       | 0.73                    | 0.94        | 0.00    | 0.00             |
| Genitourinary            | 0.78       | 0.74                    | 0.83        | 0.00    | 0.00             |
| Pregnancy                | 0.99       | 0.70                    | 1.42        | 0.97    | 0.98             |
| Perinatal                | 0.86       | 0.82                    | 0.91        | 0.00    | 0.00             |
| Malformations            | 0.86       | 0.77                    | 0.96        | 0.01    | 0.02             |
| Abnormal symptoms        | 0.88       | 0.85                    | 0.91        | 0.00    | 0.00             |
| Injury & poisoning       | 0.94       | 0.90                    | 0.99        | 0.02    | 0.03             |
| External causes          | 0.72       | 0.62                    | 0.84        | 0.00    | 0.00             |
| Health services contact  | 0.60       | 0.57                    | 0.63        | 0.00    | 0.00             |
| <b>Selected diseases</b> |            |                         |             |         |                  |
| Pneumonia                | 1.18       | 1.11                    | 1.26        | 0.00    | 0.00             |
| Influenza                | 0.75       | 0.43                    | 1.33        | 0.33    | 0.39             |
| COPD                     | 0.94       | 0.84                    | 1.05        | 0.26    | 0.33             |
| Myocardial infarction    | 1.15       | 1.05                    | 1.25        | 0.00    | 0.00             |
| Heart failure            | 1.02       | 0.90                    | 1.15        | 0.79    | 0.83             |
| Stroke                   | 1.10       | 1.03                    | 1.18        | 0.00    | 0.00             |
